# Supplementary material for: An upconversion luminescence and temperature sensor based on Yb3+/Er3+co-doped GdSr2AlO5
Source: Royal Society of Chemistry journal article supplement (doi:10.1039/c7ra13759a), 2018-01-01

## Upconversion luminescence and temperature sensor based on Yb<sup>3+</sup>/Er<sup>3+</sup> co-doped GdSr<sub>2</sub>AlO<sub>5</sub>

Gangyi Zhang<sup>ab</sup>, Qiping Qiang<sup>ab</sup>, Shanshan Du<sup>ab</sup> and Yuhua Wang<sup>ab\*</sup>

*<sup>a</sup>Department of Materials Science, School of Physical Science and Technology, Lanzhou University, Lanzhou, 730000, PR China and Key <sup>b</sup>Laboratory for Special Function Materials and Structural Design of the Ministry of Education, Lanzhou University, Lanzhou 730000, China.*

*\*Corresponding author: Yuhua Wang*

*Email address: wyh@lzu.edu.cn; tel.: +86 931 8912772; fax: +86 931 8913554.*

**Figure S1** SEM image of  $\text{GdSr}_2\text{AlO}_5$  host

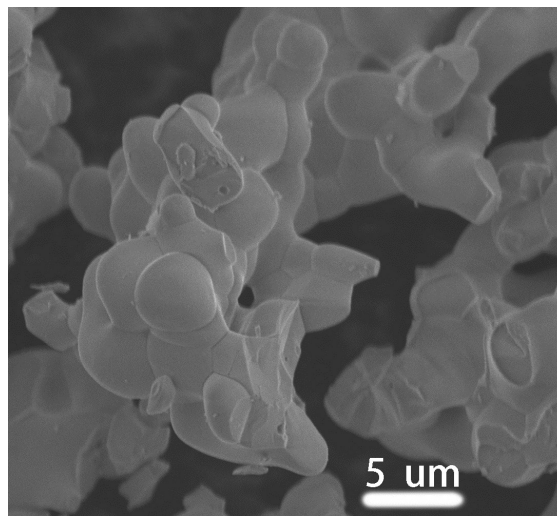

**Figure S2** UC spectra of  $\text{GdSr}_2\text{AlO}_5:\text{Yb}^{3+},\text{Er}^{3+}$  crystals with different  $\text{Yb}^{3+}$  and  $\text{Er}^{3+}$  doping conditions under the excitation of 980 nm laser.

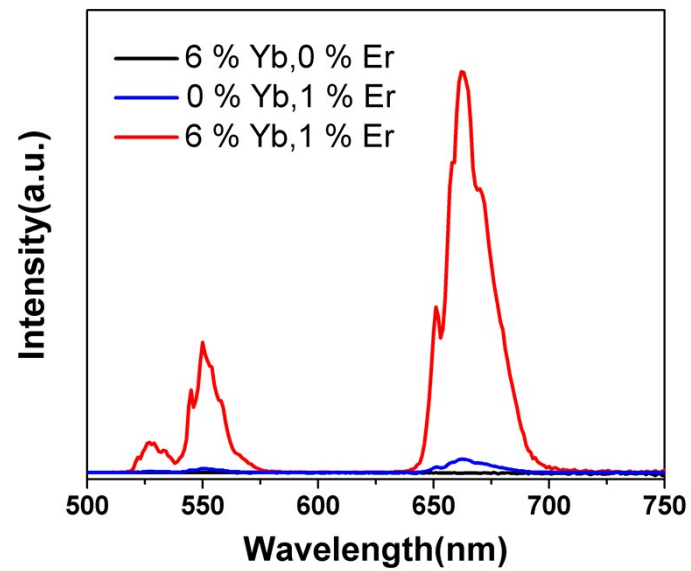

Supplement: c7ra13759a1.pdf [file c7ra13759a1.pdf]
